# Supplementary material for: Paving the Way for Outdoor Play: Examining Socio-Environmental Barriers to Community-Based Outdoor Play
Source: MDPI journal article supplement (doi:10.3390/ijerph18073617), 2021-03-31

# Graph of Estimated Marginal Means for Variable Set 1: Demographic and Household Characteristics

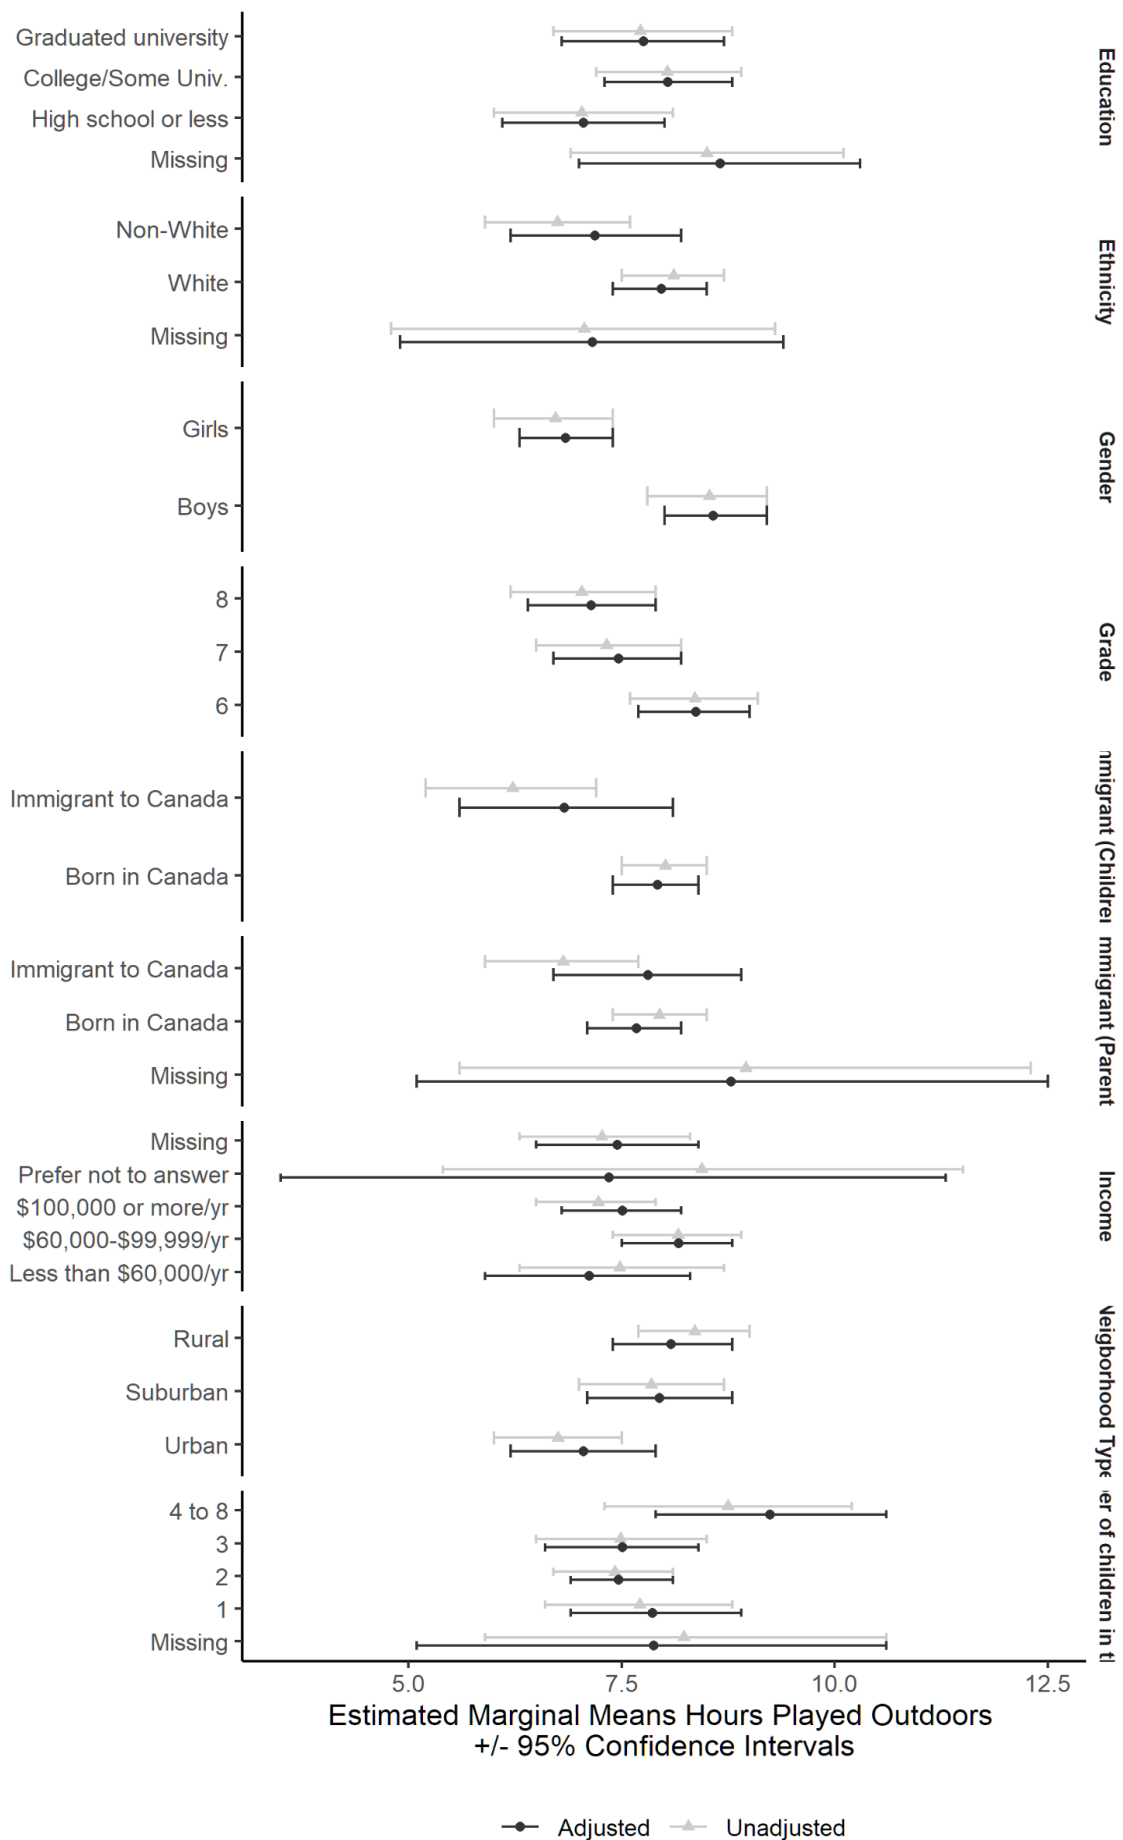

## Graphs of Estimated Marginal Means for Variable Set 2: Time Available for Outdoor Free Play

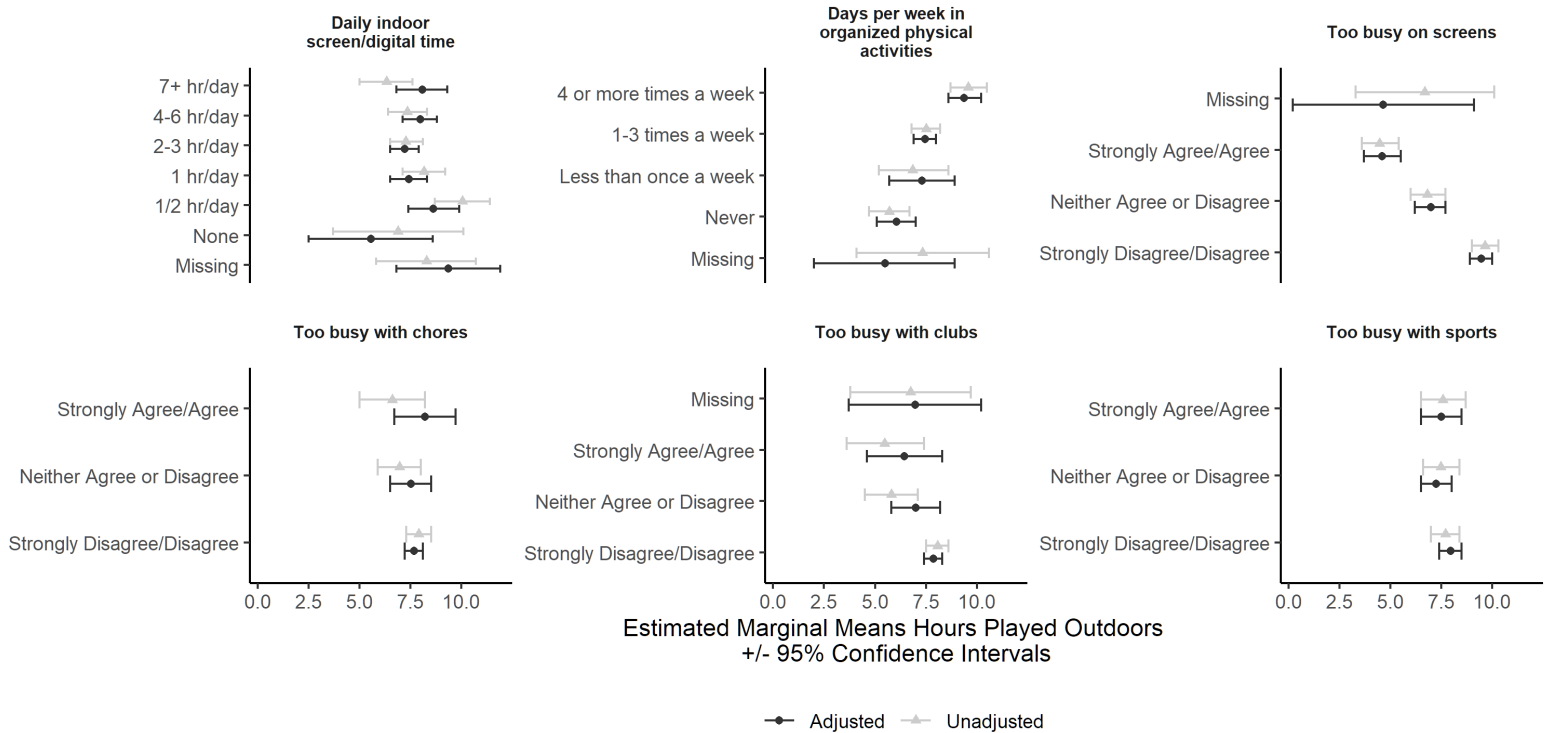

## Graphs of Estimated Marginal Means for Variable Set 3: Children's License for Community Play and Mobility

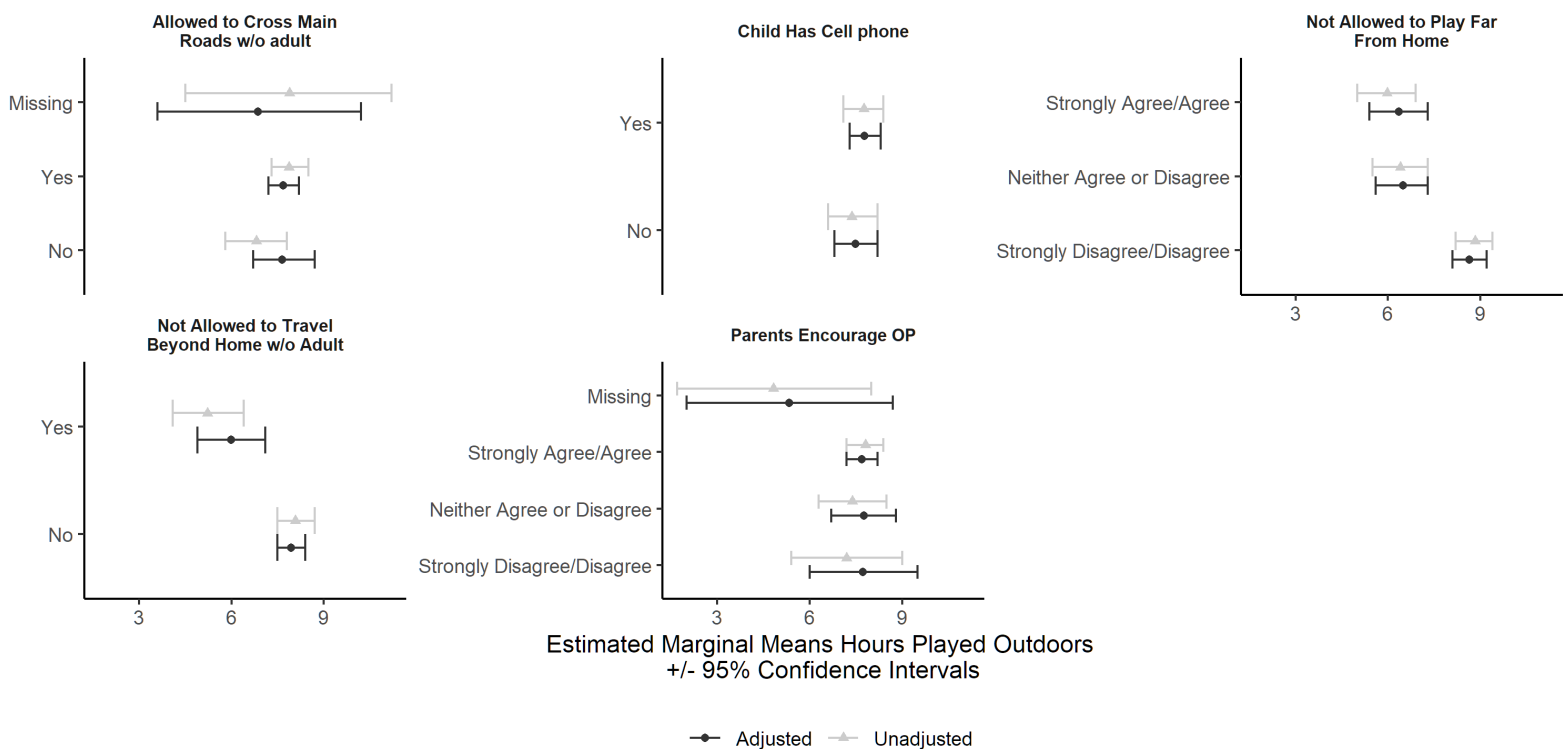

## Graphs of Estimated Marginal Means for Variable Set 4: Socio-environmental Supports for Outdoor Play

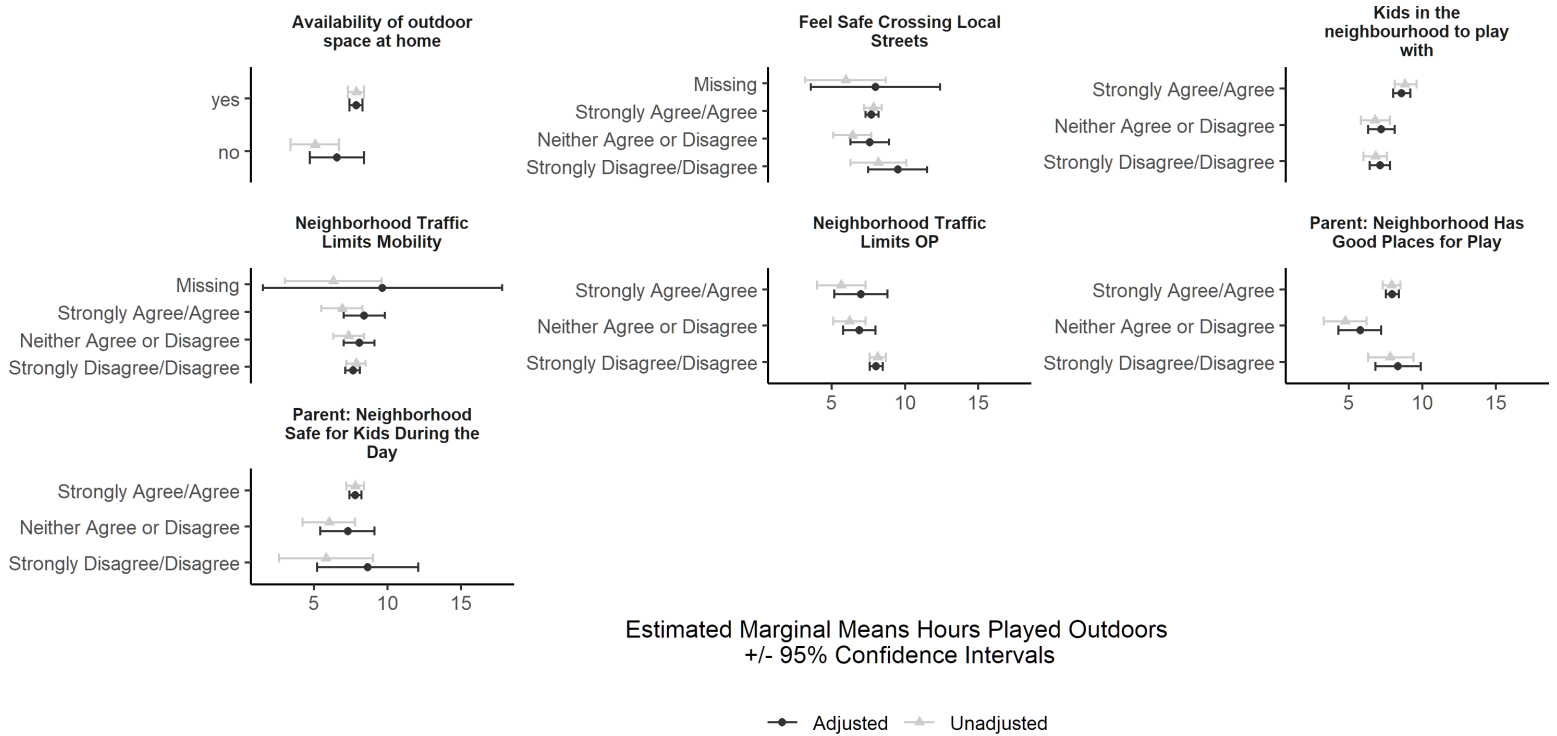

## Graphs of Estimated Marginal Means for Variable Set 5: Child and Parent Attitudes Towards Outdoor Play

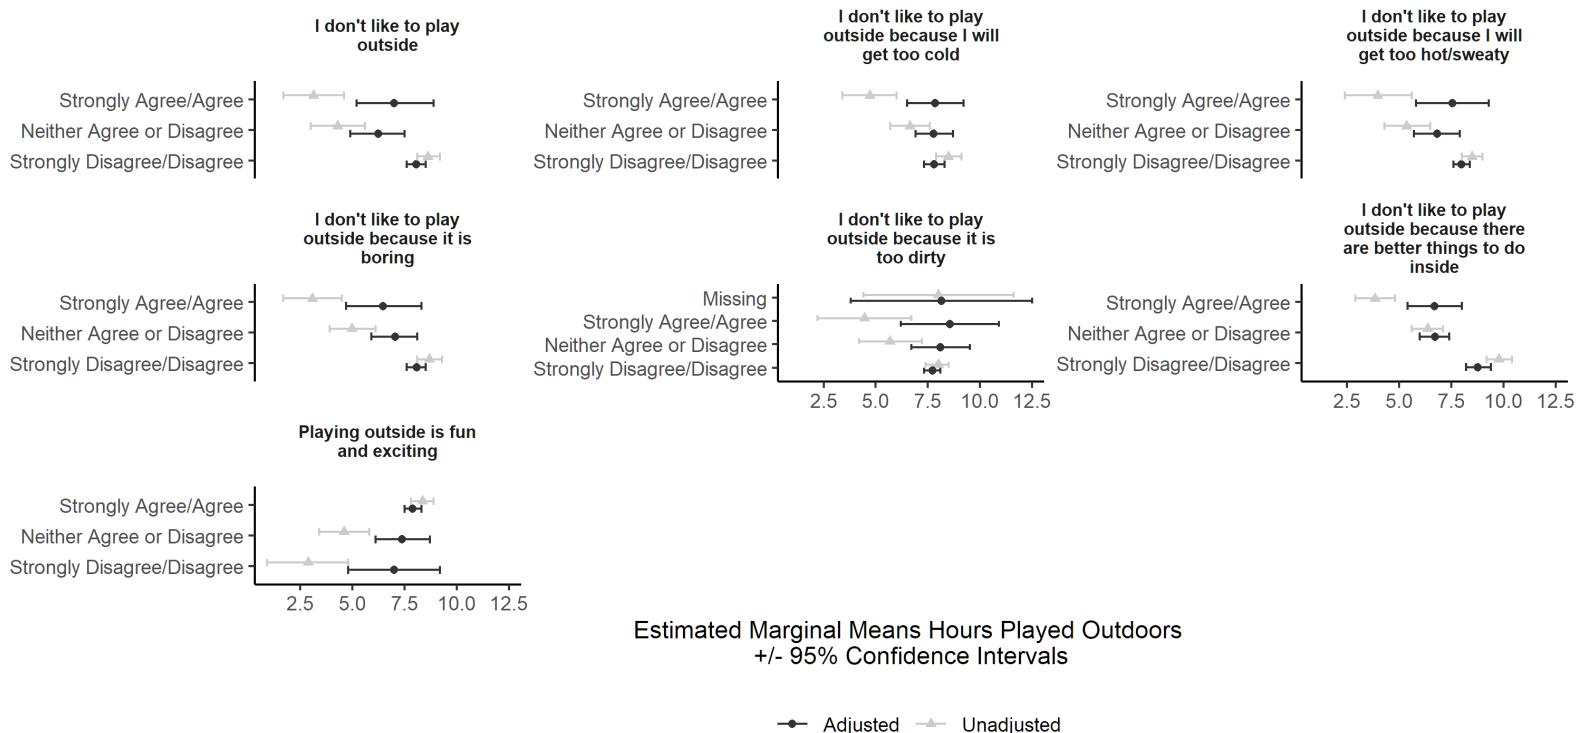

Supplement: s1 [file s1]
