# Supplementary material for: Paving the Way for Outdoor Play: Examining Socio-Environmental Barriers to Community-Based Outdoor Play
Source: Int J Environ Res Public Health. 2021 Mar 31;18(7):3617. doi: 10.3390/ijerph18073617 (PMC8037806; doi:10.3390/ijerph18073617)
Supplement: Supplementary file 1 [file ijerph-18-03617-s001.zip]

Archive with 4 entries (4 files):
- Updated Supplementary Mtl - Loebach et al/Graphs of Estimated Marginal Means.pdf
- Updated Supplementary Mtl - Loebach et al/OutdoorPlayStudy_ParentSurvey.pdf
- Updated Supplementary Mtl - Loebach et al/OutdoorPlayStudy_YouthSurvey.pdf
- Updated Supplementary Mtl - Loebach et al/Spearman Correlation Matrices.docx
